# Supplementary material for: DeepLMS: a deep learning predictive model for supporting online learning in the Covid-19 era
Source: PubMed Central journal article supplement (PMC7669866; doi:10.1038/s41598-020-76740-9), 2020-11-16
Supplement: 41598_2020_76740_MOESM1_ESM.pdf [file 41598_2020_76740_MOESM1_ESM.pdf]

# DeepLMS: A Deep Learning predictive model for supporting online learning in the Covid-19 era

Sofia B. Dias<sup>\*1</sup>, Sofia J. Hadjileontiadou<sup>\*2</sup>, José Diniz<sup>1</sup>, and Leontios J. Hadjileontiadis<sup>3,4,5,\*\*</sup>

<sup>1</sup>CIPER, Faculdade de Motricidade Humana, Universidade de Lisboa, Lisbon, Portugal.

<sup>2</sup>Department of Primary Education, Democritus University of Thrace, Alexandroupolis, Greece

<sup>3</sup>Department of Electrical Engineering and Computer Science, Khalifa University of Science and Technology, Abu Dhabi, UAE.

<sup>4</sup>Healthcare Engineering Innovation Center, Department of Biomedical Engineering, Khalifa University of Science and Technology, Abu Dhabi, UAE

<sup>5</sup>Department of Electrical and Computer Engineering, Aristotle University of Thessaloniki, Thessaloniki, Greece.

\*These authors contributed equally to this work.

\*\*Correspondence and requests for materials should be addressed to L.H. (email: leontios.hadjileontiadis@ku.ac.ae)

## ABSTRACT

Coronavirus (Covid-19) pandemic has imposed a complete shut-down of face-to-face teaching to universities and schools, forcing a crash course for online learning plans and technology for students and faculty. In the midst of this unprecedented crisis, video conferencing platforms (e.g., Zoom, WebEx, MS Teams) and learning management systems (LMSs), like Moodle, Blackboard and Google Classroom, are being adopted and heavily used as online learning environments (OLEs). However, as such media solely provide the platform for e-interaction, effective methods that can predict the learner's behavior in the OLEs should be made available as supportive tools to educators and metacognitive triggers to learners. Here we show, for the first time, that Deep Learning techniques can be used to handle LMS users' interaction data and form a novel predictive model, namely DeepLMS, that can forecast their quality of interaction (QoI) with LMS. Using Long Short-Term Memory (LSTM) networks, DeepLMS results in average testing Root Mean Square Error (RMSE) $<0.009$ , and average correlation coefficient between ground truth and predicted QoI values  $r \geq 0.97$  ( $p < 0.05$ ), when tested on QoI data from one database pre- and two ones during-Covid-19 pandemic. DeepLMS personalized QoI forecasting scaffolds user's online learning engagement and provides educators with an evaluation path, additionally to the content-related assessment, enriching overall view on learner motivation and participation in the learning process.

| FIS# | LMS Moodle metrics ( $M_1 - M_{110}$ ) |                  |                                      |          | Categorized Parameters ( $C_1 - C_{14}$ ) |                                           |
|------|----------------------------------------|------------------|--------------------------------------|----------|-------------------------------------------|-------------------------------------------|
|      | $M_{\#}$                               | 'Action'         | Combination of 'Module' and 'Action' |          | $C_{\#}$                                  | FIS Input Name                            |
|      |                                        |                  | 'Module'                             | 'Action' |                                           |                                           |
| 1    | 1                                      | View all         |                                      |          | 4                                         | Course Page (CP)                          |
|      | 2                                      | View discussion  |                                      |          | 2                                         | Forum/Discussion/Chat (F/D/C)             |
|      | 3                                      | View form        |                                      |          | 1                                         | Journal/Wiki/Blog/Form (J/W/B/F)          |
|      | 4                                      | View forum(s)    |                                      |          | 2                                         | Forum/Discussion/Chat (F/D/C)             |
|      | 5                                      | View grade       |                                      |          | 3                                         | Submission/Report/Quiz/Feedback (S/R/Q/F) |
|      | 6                                      | View graph       |                                      |          | 3                                         | Submission/Report/Quiz/Feedback (S/R/Q/F) |
|      | 7                                      | View report      |                                      |          | 3                                         | Submission/Report/Quiz/Feedback (S/R/Q/F) |
|      | 8                                      | View responses   |                                      |          | 2                                         | Forum/Discussion/Chat (F/D/C)             |
|      | 9                                      | View submission  |                                      |          | 3                                         | Submission/Report/Quiz/Feedback (S/R/Q/F) |
|      | 10                                     | View subscribers |                                      |          | 1                                         | Journal/Wiki/Blog/Form (J/W/B/F)          |
|      | 11                                     | Preview          |                                      |          | 4                                         | Course Page (CP)                          |
|      | 12                                     | Info             |                                      |          | 1                                         | Journal/Wiki/Blog/Form (J/W/B/F)          |
|      | 13                                     | Links            |                                      |          | 1                                         | Journal/Wiki/Blog/Form (J/W/B/F)          |
|      | 14                                     | Search           |                                      |          | 4                                         | Course Page (CP)                          |
|      | 15                                     | Mail error       |                                      |          | 2                                         | Forum/Discussion/Chat (F/D/C)             |
|      | 16                                     | Mark read        |                                      |          | 2                                         | Forum/Discussion/Chat (F/D/C)             |
|      | 17                                     | Templates view   |                                      |          | 4                                         | Course Page (CP)                          |
|      | 18                                     |                  | Course                               | View     | 4                                         | Course Page (CP)                          |
|      | 19                                     |                  | Glossary                             | View     | 1                                         | Journal/Wiki/Blog/Form (J/W/B/F)          |
|      | 20                                     |                  | Resource                             | View     | 4                                         | Course Page (CP)                          |
|      | 21                                     |                  | Assignment                           | View     | 3                                         | Submission/Report/Quiz/Feedback (S/R/Q/F) |
|      | 22                                     |                  | Feedback                             | View     | 3                                         | Submission/Report/Quiz/Feedback (S/R/Q/F) |
|      | 23                                     |                  | User                                 | View     | 4                                         | Course Page (CP)                          |
|      | 24                                     |                  | Choice                               | View     | 3                                         | Submission/Report/Quiz/Feedback (S/R/Q/F) |
|      | 25                                     |                  | Wiki                                 | View     | 1                                         | Journal/Wiki/Blog/Form (J/W/B/F)          |
|      | 26                                     |                  | Lesson                               | View     | 1                                         | Journal/Wiki/Blog/Form (J/W/B/F)          |
|      | 27                                     |                  | Blog                                 | View     | 1                                         | Journal/Wiki/Blog/Form (J/W/B/F)          |
|      | 28                                     |                  | Notes                                | View     | 1                                         | Journal/Wiki/Blog/Form (J/W/B/F)          |
|      | 29                                     |                  | Quiz                                 | View     | 3                                         | Submission/Report/Quiz/Feedback (S/R/Q/F) |
|      | 30                                     |                  | Scorm                                | View     | 3                                         | Submission/Report/Quiz/Feedback (S/R/Q/F) |
|      | 31                                     |                  | Data                                 | View     | 4                                         | Course Page (CP)                          |
|      | 32                                     |                  | Flashchat                            | View     | 2                                         | Forum/Discussion/Chat (F/D/C)             |
|      | 33                                     |                  | Hotpot                               | View     | 3                                         | Submission/Report/Quiz/Feedback (S/R/Q/F) |
|      | 34                                     |                  | Chat                                 | View     | 2                                         | Forum/Discussion/Chat (F/D/C)             |
|      | 35                                     |                  | Journal                              | View     | 1                                         | Journal/Wiki/Blog/Form (J/W/B/F)          |

| FIS# | LMS Moodle metrics ( $M_1 - M_{110}$ ) |                      |                                      |          | Categorized Parameters ( $C_1 - C_{14}$ ) |                           |
|------|----------------------------------------|----------------------|--------------------------------------|----------|-------------------------------------------|---------------------------|
|      | $M_{\#}$                               | 'Action'             | Combination of 'Module' and 'Action' |          | $C_{\#}$                                  | FIS Input Name            |
|      |                                        |                      | 'Module'                             | 'Action' |                                           |                           |
| 2    | 36                                     | Add mod              |                                      |          | 5                                         | Module (M)                |
|      | 37                                     | Add post             |                                      |          | 6                                         | Post/Activity (P/A)       |
|      | 38                                     | Add entry            |                                      |          | 7                                         | Resource/Assignment (R/A) |
|      | 39                                     | Add discussion       |                                      |          | 6                                         | Post/Activity (P/A)       |
|      | 40                                     | Add comment          |                                      |          | 6                                         | Post/Activity (P/A)       |
|      | 41                                     | Choose               |                                      |          | 6                                         | Post/Activity (P/A)       |
|      | 42                                     | Choose again         |                                      |          | 6                                         | Post/Activity (P/A)       |
|      | 43                                     | Start                |                                      |          | 5                                         | Module (M)                |
|      | 44                                     | Start complete       |                                      |          | 5                                         | Module (M)                |
|      | 45                                     | End                  |                                      |          | 5                                         | Module (M)                |
|      | 46                                     | Fields add           |                                      |          | 5                                         | Module (M)                |
|      | 47                                     | Report               |                                      |          | 6                                         | Post/Activity (P/A)       |
|      | 48                                     | Report live          |                                      |          | 6                                         | Post/Activity (P/A)       |
|      | 49                                     | Report log           |                                      |          | 6                                         | Post/Activity (P/A)       |
|      | 50                                     | Report outline       |                                      |          | 6                                         | Post/Activity (P/A)       |
|      | 51                                     | Report participation |                                      |          | 6                                         | Post/Activity (P/A)       |
|      | 52                                     | Report stats         |                                      |          | 6                                         | Post/Activity (P/A)       |
|      | 53                                     | Submit               |                                      |          | 6                                         | Post/Activity (P/A)       |
|      | 54                                     | Subscribe            |                                      |          | 6                                         | Post/Activity (P/A)       |
|      | 55                                     | Subscribe all        |                                      |          | 6                                         | Post/Activity (P/A)       |
|      | 56                                     | Talk                 |                                      |          | 6                                         | Post/Activity (P/A)       |
|      | 57                                     | Attempt              |                                      |          | 6                                         | Post/Activity (P/A)       |
|      | 58                                     | Continue attempt     |                                      |          | 6                                         | Post/Activity (P/A)       |
|      | 59                                     | User report          |                                      |          | 6                                         | Post/Activity (P/A)       |
|      | 60                                     | Bogus                |                                      |          | 6                                         | Post/Activity (P/A)       |
|      | 61                                     | Set page flags       |                                      |          | 6                                         | Post/Activity (P/A)       |
|      | 62                                     |                      | Resource                             | Add      | 7                                         | Resource/Assignment (R/A) |
|      | 63                                     |                      | Chat                                 | Add      | 6                                         | Post/Activity (P/A)       |
|      | 64                                     |                      | Forum                                | Add      | 6                                         | Post/Activity (P/A)       |
|      | 65                                     |                      | Label                                | Add      | 8                                         | Label (L)                 |
|      | 66                                     |                      | Assignment                           | Add      | 6                                         | Post/Activity (P/A)       |
|      | 67                                     |                      | Feedback                             | Add      | 6                                         | Post/Activity (P/A)       |
|      | 68                                     |                      | Choice                               | Add      | 6                                         | Post/Activity (P/A)       |
|      | 69                                     |                      | Calendar                             | Add      | 6                                         | Post/Activity (P/A)       |
|      | 70                                     |                      | Wiki                                 | Add      | 6                                         | Post/Activity (P/A)       |
|      | 71                                     |                      | Glossary                             | Add      | 6                                         | Post/Activity (P/A)       |
|      | 72                                     |                      | Data                                 | Add      | 5                                         | Module (M)                |
|      | 73                                     |                      | Lesson                               | Add      | 5                                         | Module (M)                |
|      | 74                                     |                      | Flashchat                            | Add      | 6                                         | Post/Activity (P/A)       |
|      | 75                                     |                      | Hotpot                               | Add      | 6                                         | Post/Activity (P/A)       |
|      | 76                                     |                      | Journal                              | Add      | 6                                         | Post/Activity (P/A)       |
|      | 77                                     |                      | Quiz                                 | Add      | 6                                         | Post/Activity (P/A)       |
|      | 78                                     |                      | Scorm                                | Add      | 5                                         | Module (M)                |

| FIS# | LMS Moodle metrics ( $M_1 - M_{110}$ ) |                                         |                                      |          | Categorized Parameters ( $C_1 - C_{14}$ ) |                      |
|------|----------------------------------------|-----------------------------------------|--------------------------------------|----------|-------------------------------------------|----------------------|
|      | $M_{\#}$                               | 'Action'                                | Combination of 'Module' and 'Action' |          | $C_{\#}$                                  | FIS Input Name       |
|      |                                        |                                         | 'Module'                             | 'Action' |                                           |                      |
|      | 79                                     |                                         | Survey                               | Add      | 5                                         | Module (M)           |
| 3    | 80                                     | Assign                                  |                                      |          | 11                                        | Assign (A)           |
|      | 81                                     | Unassign                                |                                      |          | 12                                        | Edit/Delete (E/D)    |
|      | 82                                     | Enrol                                   |                                      |          | 11                                        | Assign (A)           |
|      | 83                                     | Unenrol                                 |                                      |          | 12                                        | Edit/Delete (E/D)    |
|      | 84                                     | Unsubscribe                             |                                      |          | 12                                        | Edit/Delete (E/D)    |
|      | 85                                     | Upload                                  |                                      |          | 9                                         | Upload (UP)          |
|      | 86                                     | Attachment                              |                                      |          | 9                                         | Upload (UP)          |
|      | 87                                     | Update                                  |                                      |          | 10                                        | Update (U)           |
|      | 88                                     | Update comment                          |                                      |          | 10                                        | Update (U)           |
|      | 89                                     | Update entry                            |                                      |          | 10                                        | Update (U)           |
|      | 90                                     | Update feedback                         |                                      |          | 10                                        | Update (U)           |
|      | 91                                     | Update grades                           |                                      |          | 10                                        | Update (U)           |
|      | 92                                     | Update mod                              |                                      |          | 10                                        | Update (U)           |
|      | 93                                     | Update post                             |                                      |          | 10                                        | Update (U)           |
|      | 94                                     | Fields update                           |                                      |          | 10                                        | Update (U)           |
|      | 95                                     | Recent                                  |                                      |          | 10                                        | Update (U)           |
|      | 96                                     | Move discussions                        |                                      |          | 10                                        | Update (U)           |
|      | 97                                     | Templates saved                         |                                      |          | 9                                         | Upload (UP)          |
|      | 98                                     | Edit                                    |                                      |          | 12                                        | Edit/Delete (E/D)    |
|      | 99                                     | Edit section                            |                                      |          | 12                                        | Edit/Delete (E/D)    |
|      | 100                                    | Edit questions                          |                                      |          | 12                                        | Edit/Delete (E/D)    |
|      | 101                                    | Delete                                  |                                      |          | 12                                        | Edit/Delete (E/D)    |
|      | 102                                    | Delete all                              |                                      |          | 12                                        | Edit/Delete (E/D)    |
|      | 103                                    | Delete attempt                          |                                      |          | 12                                        | Edit/Delete (E/D)    |
|      | 104                                    | Delete comment                          |                                      |          | 12                                        | Edit/Delete (E/D)    |
|      | 105                                    | Delete discussion                       |                                      |          | 12                                        | Edit/Delete (E/D)    |
|      | 106                                    | Delete entry                            |                                      |          | 12                                        | Edit/Delete (E/D)    |
|      | 107                                    | Delete mod                              |                                      |          | 12                                        | Edit/Delete (E/D)    |
|      | 108                                    | Delete post                             |                                      |          | 12                                        | Edit/Delete (E/D)    |
|      | 109                                    | Change password                         |                                      |          | 12                                        | Edit/Delete (E/D)    |
|      | 110                                    | Review                                  |                                      |          | 12                                        | Edit/Delete (E/D)    |
| 5    | -                                      | (directly from Moodle date log)         |                                      |          | 13                                        | Time Period (TP)     |
|      | -                                      | (directly from Moodle login/logout log) |                                      |          | 14                                        | Engagement Time (ET) |

**Table S1. Codification of all LMS Moodle metrics ( $M_1 - M_{110}$ ) as categorized parameters ( $C_1 - C_{14}$ ), fed as inputs to the Fuzzy Inference Systems (FIS1, FIS2, FIS3, and FS5) of the FuzzyQoI model<sup>42</sup>. The metrics ( $M_1 - M_{110}$ ) sustain their original code name as exported by Moodle; the parameters of the 14 categories ( $C_1 - C_{14}$ ) are named here as used in<sup>42</sup>.**
